# Supplementary material
Source: publisher site journal article supplement (https://www.dovepress.com/article/594032)
Supplement: Supplementary file 1 [file 594032%20Supplementary%20Tables.doc]

**Supplementary Table S1. Full Multivariable Logistic Regression Model for Concomitant Pulmonary Infection Status**

| **Variable** | **Category / Unit** | **β Coefficient** | **Standard Error** | **Wald χ²** | **P-value** | **Adjusted OR (aOR)** | **95% CI for aOR** |
| --- | --- | --- | --- | --- | --- | --- | --- |
| PNI | (per 1‑unit increase) | -0.038 | 0.012 | 9.52 | **0.002** | 0.964 | 0.942 – 0.986 |
| NLR | (per 1‑unit increase) | 0.069 | 0.079 | 0.771 | 0.38 | 1.072 | 0.918 – 1.251 |
| PLR | (per 1‑unit increase) | -0.001 | 0.002 | 0.098 | 0.754 | 0.999 | 0.996 – 1.003 |
| MLR | (per 0.1‑unit increase) | -0.47 | 0.567 | 0.687 | 0.407 | 0.625 | 0.206 – 1.899 |
| SII | (per 1‑unit increase) | 0.0008 | 0.0002 | 16 | **<0.001** | 1.001 | 1.000 – 1.001 |
| Age | (per 1‑year increase) | 0.005 | 0.011 | 0.21 | 0.649 | 1.005 | 0.984 – 1.027 |
| Sex | Male (Ref: Female) | 0.102 | 0.245 | 0.17 | 0.678 | 1.107 | 0.685 – 1.789 |
| Hospital stay | (per 1‑day increase) | 0.15 | 0.03 | 25 | **<0.001** | 1.162 | 1.095 – 1.232 |
| Hypertension | Yes (Ref: No) | 0.02 | 0.15 | 0.02 | 0.894 | 1.02 | 0.760 – 1.369 |
| Diabetes | Yes (Ref: No) | -0.15 | 0.15 | 1 | 0.317 | 0.861 | 0.641 – 1.156 |
| Cardiovascular disease | Yes (Ref: No) | -0.1 | 0.16 | 0.39 | 0.532 | 0.905 | 0.661 – 1.239 |
| Pathological type |  |  |  |  |  |  |  |
| Squamous cell carcinoma | Ref: Adenocarcinoma | 0.4 | 0.18 | 4.94 | **0.026** | 1.492 | 1.048 – 2.124 |
| Small cell lung cancer | Ref: Adenocarcinoma | 0.55 | 0.25 | 4.84 | **0.028** | 1.773 | 1.062-2.828 |
| Others | Ref: Adenocarcinoma | 0.18 | 0.22 | 0.67 | 0.413 | 1.197 | 0.778-1.842 |
| Smoking status | Yes (Ref: No) | 0.22 | 0.18 | 1.49 | 0.222 | 1.246 | 0.876 – 1.773 |
| COPD | Yes (Ref: No) | -0.21 | 0.239 | 0.77 | 0.38 | 0.811 | 0.507 – 1.296 |
| Lymph Node Metastasis | Yes (Ref: No) | -0.55 | 0.23 | 5.72 | **0.017** | 0.577 | 0.368 – 0.906 |
| Chemotherapy Status | Yes (Ref: No) | -1.386 | 0.248 | 31.22 | **<0.001** | 0.25 | 0.154 – 0.406 |
| Radiotherapy | Yes (Ref: No) | 0.05 | 0.13 | 0.15 | 0.701 | 1.051 | 0.815 – 1.356 |
| Targeted therapy | Yes (Ref: No) | -0.36 | 0.16 | 5.06 | **0.024** | 0.698 | 0.510 – 0.955 |
| Immunotherapy | Yes (Ref: No) | -0.25 | 0.14 | 3.19 | 0.074 | 0.779 | 0.592 – 1.025 |
| Nutritional support | Yes (Ref: No) | 0.12 | 0.15 | 0.64 | 0.424 | 1.127 | 0.840 – 1.513 |
| Constant | – | 2.1 | 1.502 | 1.96 | 0.162 | 8.166 | – |

Note: Multivariable logistic regression analysis for concomitant pulmonary infection. All variables were entered simultaneously. PNI and MLR were modeled per 1-unit and per 0.1-unit increase, respectively; other continuous variables per 1-unit increase. Bold indicates P < 0.05. PNI: Prognostic Nutritional Index; NLR: neutrophil-to-lymphocyte ratio; PLR: platelet-to-lymphocyte ratio; MLR: monocyte-to-lymphocyte ratio; SII: systemic immune-inflammation index; COPD: chronic obstructive pulmonary disease.

| **Supplementary Table S2. Full Multivariable Logistic Regression Model for In-Hospital Mortality in Patients with Concomitant Pulmonary Infection** | | | | | | | |
| --- | --- | --- | --- | --- | --- | --- | --- |
| **Variable** | **Category / Unit** | **β Coefficient** | **Standard Error** | **Wald χ²** | **P-value** | **Adjusted OR (aOR)** | **95% CI for aOR** |
| PNI | per 1-unit increase | -0.158 | 0.036 | 19.29 | **<0.001** | 0.854 | 0.796 – 0.916 |
| NLR | per 1-unit increase | 0.051 | 0.067 | 0.572 | 0.45 | 1.052 | 0.922 – 1.200 |
| PLR | per 1-unit increase | 0.002 | 0.002 | 0.562 | 0.454 | 1.002 | 0.997 – 1.006 |
| MLR | per 0.1-unit increase | 0.32 | 0.15 | 4.55 | **0.033** | 1.377 | 1.026 – 1.849 |
| SII | per 1-unit increase | 0.001 | 0.001 | 1.682 | 0.195 | 1 | 0.999 – 1.000 |
| Age | per 1-year increase | -0.025 | 0.022 | 1.29 | 0.256 | 0.975 | 0.934 – 1.018 |
| Sex | Male (Ref: Female) | 0.205 | 0.445 | 0.21 | 0.645 | 1.227 | 0.513 – 2.937 |
| Hospital stay | per 1-day increase | -0.019 | 0.043 | 0.195 | 0.659 | 0.981 | 0.901 – 1.068 |
| Hypertension | Yes (Ref: No) | 0.244 | 0.504 | 0.234 | 0.628 | 1.276 | 0.475 – 3.426 |
| Diabetes | Yes (Ref: No) | -0.055 | 0.744 | 0.005 | 0.941 | 0.947 | 0.220 – 4.065 |
| Cardiovascular disease | Yes (Ref: No) | -0.580 | 0.517 | 1.258 | 0.262 | 0.56 | 0.203 – 1.543 |
| Pathological type |  |  |  |  |  |  |  |
| Squamous cell carcinoma | Ref: Adenocarcinoma | 0.15 | 0.30 | 0.25 | 0.617 | 1.162 | 0.645-2.093 |
| Small cell lung cancer | Ref: Adenocarcinoma | 0.42 | 0.38 | 1.22 | 0.269 | 1.522 | 0.722-3.208 |
| Others | Ref: Adenocarcinoma | -0.10 | 0.35 | 0.08 | 0.775 | 0.905 | 0.456-1.795 |
| Smoking status | Yes (Ref: No) | 0.447 | 0.24 | 3.455 | 0.063 | 1.563 | 0.976 – 2.504 |
| COPD | Yes (Ref: No) | 0.17 | 0.49 | 0.121 | 0.728 | 1.186 | 0.454 – 3.095 |
| Lymph Node Metastasis | Yes (Ref: No) | 0.222 | 0.448 | 0.246 | 0.62 | 1.249 | 0.519 – 3.004 |
| Chemotherapy Status | Yes (Ref: No) | 0.688 | 0.452 | 2.32 | 0.128 | 1.99 | 0.820 – 4.831 |
| Radiotherapy | Yes (Ref: No) | 0.875 | 1.252 | 0.488 | 0.485 | 2.399 | 0.206 – 27.935 |
| Targeted therapy | Yes (Ref: No) | -0.148 | 0.59 | 0.063 | 0.802 | 0.863 | 0.272 – 2.741 |
| Immunotherapy | Yes (Ref: No) | 0.497 | 0.663 | 0.562 | 0.453 | 1.644 | 0.448 – 6.029 |
| Nutritional support | Yes (Ref: No) | -0.713 | 0.576 | 1.531 | 0.216 | 0.49 | 0.159 – 1.516 |
| Constant | – | 5.892 | 2.512 | 5.5 | 0.019 | 361.5 | — |

Note: Multivariable logistic regression analysis for in-hospital mortality among patients with concomitant pulmonary infection. All variables were entered simultaneously. PNI and MLR were modeled per 1-unit and per 0.1-unit increase, respectively; other continuous variables per 1-unit increase. Bold indicates P < 0.05. The wide CI for radiotherapy reflects small sample size. PNI: Prognostic Nutritional Index; NLR: neutrophil-to-lymphocyte ratio; PLR: platelet-to-lymphocyte ratio; MLR: monocyte-to-lymphocyte ratio; SII: systemic immune-inflammation index; COPD: chronic obstructive pulmonary disease.
